# Supplementary material for: A multiproxy database of western North American Holocene paleoclimate records
Source: Copernicus journal article supplement (doi:10.5194/essd-13-1613-2021), 2021-04-19
Supplement: Supplementary file [file essd-13-1613-2021-supplement-title-page.pdf › essd-13-1613-2021-supplement-title-page.pdf]

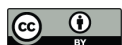

## *Supplement of*

# **A multiproxy database of western North American Holocene paleoclimate records**

**Cody C. Routson et al.**

*Correspondence to:* Cody C. Routson ([cody.routson@nau.edu](mailto:cody.routson@nau.edu))

- [essd-13-1613-2021-supplement-title-page.pdf](#)
- [supplementaryInformation](#)
  - [SupplementaryTable1.xlsx](#)
  - [dashboards\\_WesternNorthAmerica.pdf](#)

The copyright of individual parts of the supplement might differ from the article licence.
